# Supplementary material for: Assessment of change in knowledge about research methods among delegates attending research methodology workshop
Source: PubMed Central journal article supplement — Perspect Clin Res. 2018 Apr-Jun;9(2):83–90. doi: 10.4103/picr.PICR_41_17 (PMC5950615; doi:10.4103/picr.picr_41_17), 2018
Supplement: PCR-9-83_Suppl1.pdf [file PCR-9-83_Suppl1.pdf]

## ANNEXURE 1

Please encircle the correct answer

1. PICOT is criteria for
  - a. Formulating research question
  - b. Planning RCT
  - c. Observational study
  - d. Case study
2. Consort guidelines are used for
  - a. Randomized control trial
  - b. Observational study
  - c. Case study
  - d. Systematic review
3. A good research question is innovative since it provides new findings and adequate technical expertise.
  - a. True
  - b. False
4. Which of the following variables is a continuous quantitative variable?
  - a. Favorite fruit
  - b. Gender
  - c. Occupation
  - d. Decade of birth
  - e. Age at first birth
5. If you have left-skewed data, which of the following will be true?
  - a. Mean > median
  - b. Mean  $\geq$  median
  - c. Median  $\geq$  mean
  - d. Median > mean
  - e. Mean = media
6. If you toss a six-sided die, what is the probability that you roll a 3 or less?
  - a. 1/6
  - b. 1/3
  - c. 1/2
  - d. 1/4
  - e. 5/6
7. If the null hypothesis is true (there is no effect), you cannot make a Type II error.
  - a. True
  - b. False
8. What is statistical power?
  - a. The probability of getting a statistically significant result when the null hypothesis is true
  - b. The probability of getting a statistically significant result when the null hypothesis is false.
  - c. The probability of getting a nonsignificant result when the null hypothesis is true.
  - d. The probability of getting a nonsignificant result when the null hypothesis is false.
9. A variable that is presumed to cause a change in another variable is called
  - a. Categorical variable

- b. Dependent variable
  - c. Independent variable
  - d. Intervening variable
10. Qualitative research is often exploratory and has all of the following characteristics except:
- a. It is typically used when a great deal is already known about the topic of interest
  - b. It relies on the collection of nonnumerical data such as words and pictures
  - c. It is used to generate hypotheses and develop theory about phenomena in the world
  - d. It uses the inductive scientific method
11. The strongest evidence for causality comes from which of the following research methods?
- a. Experimental
  - b. Causal-comparative
  - c. Correlational
  - d. Ethnography
12. When each member of a population has an equally likely chance of being selected, this is called:
- a. A nonrandom sampling method
  - b. A quota sample
  - c. A snowball sample
  - d. An equal-probability selection method
13. As a general rule, the \_\_\_\_\_ is the best measure of central tendency because it is more precise.
- a. Mean
  - b. Median
  - c. Mode
  - d. Range
14. What does it mean when you calculate a 95% confidence interval?
- a. The process you used will capture the true parameter 95% of the time in the long run
  - b. You can be “95% confident” that your interval will include the population parameter
  - c. You can be “5% confident” that your interval will not include the population parameter
  - d. All of the above statements are true
15. What is the standard deviation of a sampling distribution called?
- a. Sampling error
  - b. Sample error
  - c. Standard error
  - d. Simple error
16. \_\_\_\_\_ results if you fail to reject the null hypothesis when the null hypothesis is actually false.
- a. Type I error
  - b. Type II error
  - c. Type III error
  - d. Type IV error
17. A statistical test used to determine whether a correlation coefficient is statistically significant is called the \_\_\_\_\_
- a. One-way analysis of variance
  - b. *t*-test for independent samples
  - c. Chi-square test for contingency tables
  - d. *t*-test for correlation coefficients

18. This type of research tests hypotheses and theories to explain how and why a phenomenon operates as it does.
  - a. Descriptive research
  - b. Predictive research
  - c. Explanatory research
  - d. None of the above
19. Which of these is not a method of data collection?
  - a. Questionnaires
  - b. Interviews
  - c. Experiments
  - d. Observations
20. Which of the following terms best describes data that were originally collected at an earlier time by a different person for a different purpose?
  - a. Primary data
  - b. Secondary data
  - c. Experimental data
  - d. Field notes
